# Supplementary material
Source: publisher figshare collection journal article supplement (https://karger.figshare.com/ndownloader/files/27359645)
Supplement: Supplementary file 1 [file 27359645]

**Supplemental Table 1** Mean Changes in Visual Acuity Compared to Baseline for the Entire Population and Stratified by Presenting Visual Acuity Groups (Last Observation Carried Forward)

| **Mean Change in VA from Baseline** | **Overall** | | | **Moderate to Severe Visual Impairment** | | | | **Mild Visual Impairment** | | | |
| --- | --- | --- | --- | --- | --- | --- | --- | --- | --- | --- | --- |
| **Mean** | **95% CI** | **P Value** | | **Mean** | **95% CI** | **P Value** | | **Mean** | **95% CI** | **P Value** | |
| At 12 months | +6.9 | +5.2 to +8.5 | <0.001 | | +8.8 | +6.9 to +10.7 | <0.001 | | +1.6 | -1.6 to +4.7 | 0.325 | |
| At 24 months | +5.0 | +3.3 to +6.8 | <0.001 | | +8.0 | +6.0 to +10.0 | <0.001 | | -2.9 | -6.2 to 0.4 | 0.080 | |
| At 36 months | +4.0 | +2.1 to +5.9 | <0.001 | | +6.9 | +4.7 to +9.1 | <0.001 | | -3.3 | -6.8 to 0.2 | 0.065 | |
| *VA = visual acuity, CI = confidence interval* | | | | | | | | | | | |
